# Supplementary material
Source: PubMed Central journal article supplement (PMC4976029)
Supplement: NIHMS793319-supplement-1.pdf [file NIHMS793319-supplement-1.pdf]

Fig. S1

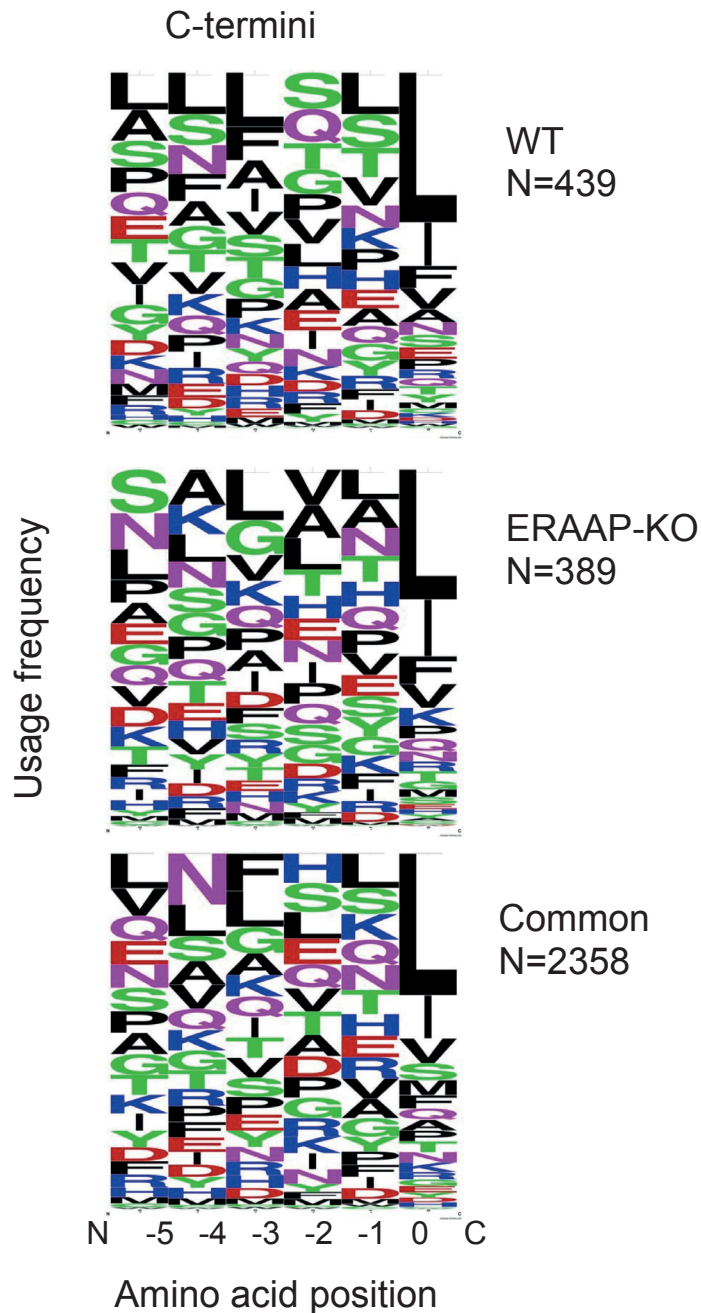

**Figure S1** Weblogo plots, showing the C-terminal amino acid composition peptides either specific to WT and ERAAP-deficient cells, or common to both. Amino acids are represented by their single letter symbol, and the size of the letter is proportional to the frequency with which that amino acid occurs at the position indicated on the X-axis. The color of the letter indicates the chemical nature of the amino acid as follows: Green-polar, Black-hydrophobic, Red-acidic Magenta- Blue-basic. Numbers indicate the numbers of peptides in each group.

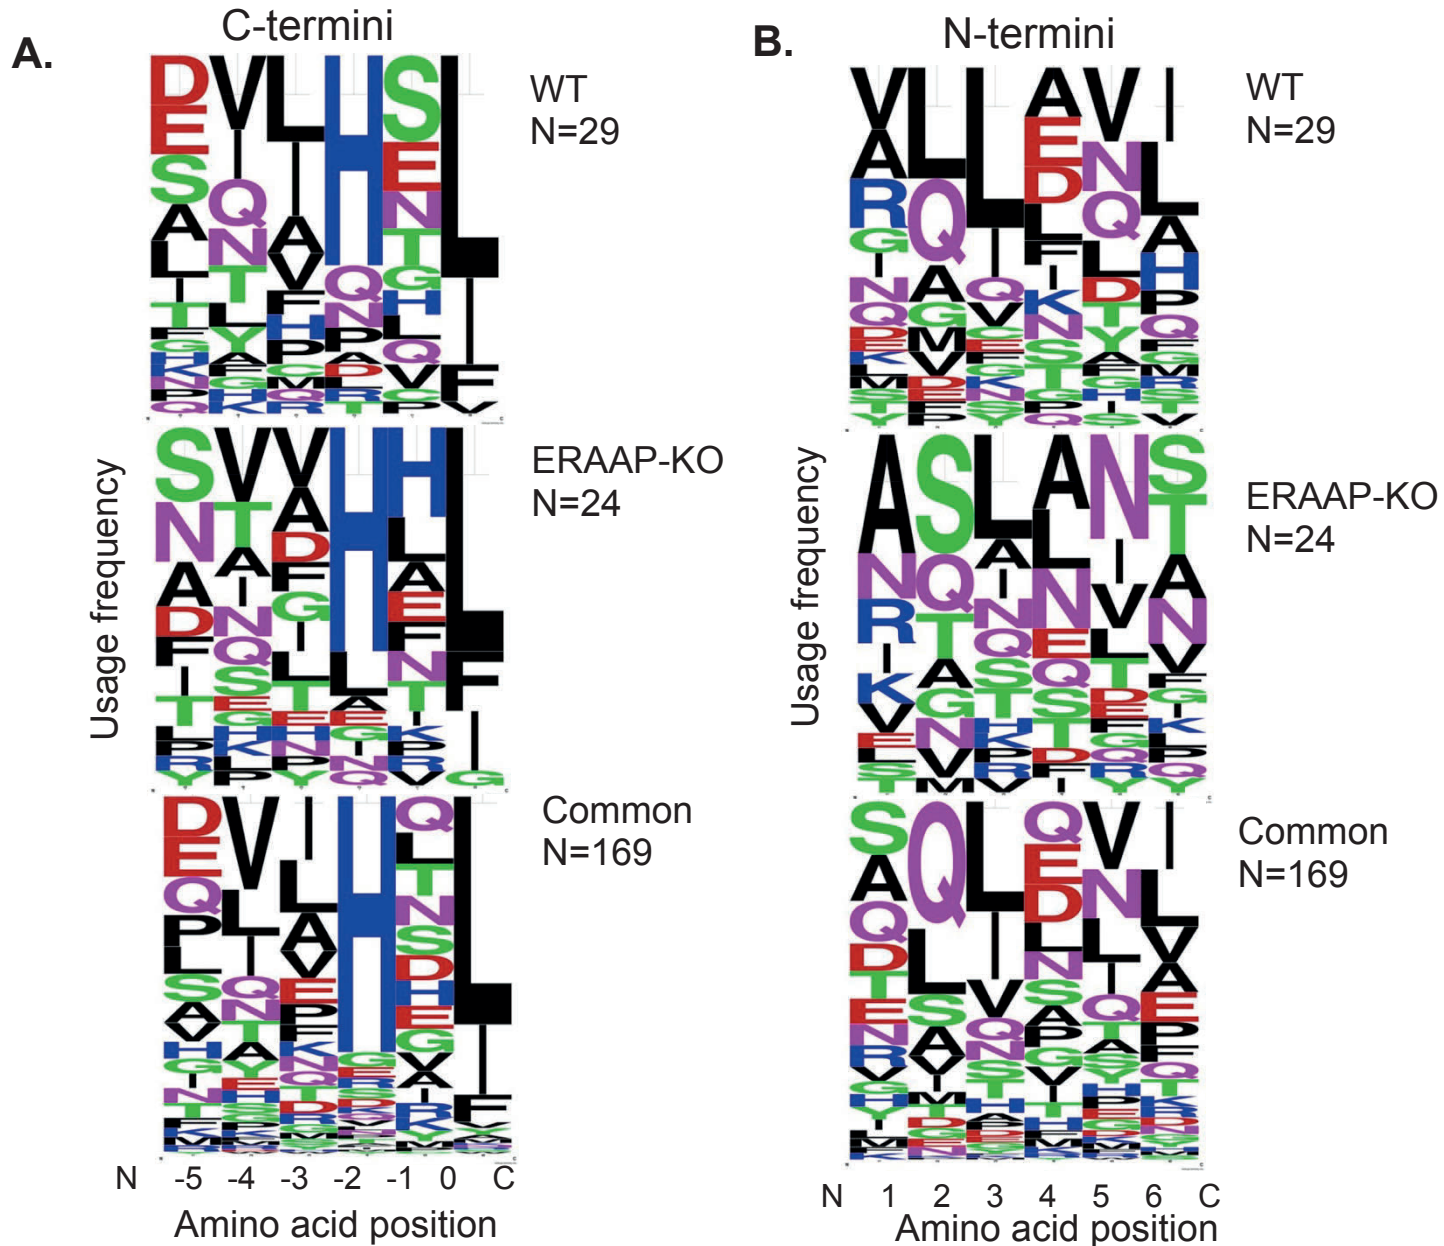

**Figure S2:** Weblogo plots, showing the **A.** N-terminal and **B.** C-terminal amino acid composition of Qa-2-associated peptides either specific to WT and ERAAP-deficient cells, or common to both. Amino acids are represented by their single letter symbol, and the size of the letter is proportional to the frequency with which that amino acid occurs at the position indicated on the X-axis. The color of the letter indicates the chemical nature of the amino acid as follows: Green-polar, Black-hydrophobic, Red-acidic Magenta- Blue-basic. Numbers indicate the numbers of peptides in each group.
